# Supplementary material for: Conservation genetics of two threatened frogs from the Mambilla highlands, Nigeria
Source: PLoS One. 2018 Aug 15;13(8):e0202010. doi: 10.1371/journal.pone.0202010 (PMC6093670; doi:10.1371/journal.pone.0202010)
Supplement: S1 Table — Together, the two preferred primer combinations ESP1B/MSP3 and ESP1B/MSP6 yielded 275 loci for the 198 samples representing both species. (XLSX) [file pone.0202010.s003.xlsx]

## Sheet: Cardioglossa schioetzi_AFLP
Cardioglossa schioetzi
EM3- Loci from primer combination ESP1B/MSP3
EM6- Loci from primer combination ESP1B/MSP6
ITEM_ID	LOCALITY	EM3_1	EM3_2	EM3_3	EM3_4	EM3_5	EM3_6	EM3_7	EM3_8	EM3_9	EM3_10	EM3_11	EM3_12	EM3_13	EM3_14	EM3_15	EM3_16	EM3_17	EM3_18	EM3_19	EM3_20	EM3_21	EM3_22	EM3_23	EM3_24	EM3_25	EM3_26	EM3_27	EM3_28	EM3_29	EM3_30	EM3_31	EM3_32	EM3_33	EM3_34	EM3_35	EM3_36	EM3_37	EM3_38	EM3_39	EM3_40	EM3_41	EM3_42	EM3_43	EM3_44	EM3_45	EM3_46	EM3_47	EM3_48
72	MFI	0	1	1	0	0	1	0	1	0	1	0	1	1	1	0	1	1	1	1	1	0	1	0	1	0	1	1	0	1	0	1	0	0	1	0	1	1	0	1	1	0	0	0	1	0	0	0	0
72	MFI	0	1	1	0	0	1	0	1	0	1	0	1	1	1	0	1	1	1	1	1	0	1	0	1	0	1	1	0	1	0	1	0	0	1	0	1	1	0	1	1	0	0	0	1	0	0	0	0
73	MFI	0	1	1	0	0	1	0	1	0	1	0	1	1	1	0	1	1	1	1	1	0	1	0	1	0	1	1	0	0	0	1	0	0	1	0	1	1	0	1	1	0	0	0	1	0	0	0	0
73	MFI	0	1	1	0	0	1	0	1	0	1	0	1	1	1	0	1	1	1	1	1	0	1	0	1	0	1	1	0	0	0	1	0	0	1	0	1	1	0	1	1	0	0	0	1	0	0	0	0
74	MFI	0	1	1	0	0	1	0	1	0	1	0	1	1	1	0	1	1	1	1	1	0	1	0	0	0	1	1	1	0	0	0	0	0	0	0	0	1	0	0	1	0	0	0	0	0	0	0	0
74	MFI	0	1	1	0	0	1	0	1	0	1	0	1	1	1	0	1	1	1	1	1	0	1	0	0	0	1	1	1	0	0	0	0	0	0	0	0	1	0	0	1	0	0	0	0	0	0	0	0
75	MFI	0	1	1	0	0	1	0	1	1	1	0	1	1	1	0	1	1	1	1	1	0	1	0	1	0	1	1	0	0	0	1	0	0	1	0	1	1	0	1	1	0	0	0	1	0	0	0	0
75	MFI	0	1	1	0	0	1	0	1	1	1	0	1	1	1	0	1	1	1	1	1	0	1	0	1	0	1	1	0	0	0	1	0	0	1	0	1	1	0	1	1	0	0	0	1	0	0	0	0
87	MFI	0	1	1	0	0	0	0	1	0	0	0	1	0	1	0	1	0	0	1	1	0	1	0	0	0	1	0	0	0	0	0	0	0	0	0	0	0	0	0	0	0	0	0	0	0	0	0	0
87	MFI	0	1	1	0	0	0	0	1	0	0	0	1	0	1	0	1	0	0	1	1	0	1	0	0	0	1	0	0	0	0	0	0	0	0	0	0	0	0	0	0	0	0	0	0	0	0	0	0
88	MFI	0	1	0	1	0	0	0	1	0	0	0	1	0	0	0	1	0	0	0	0	0	0	0	0	0	0	0	0	0	0	0	0	0	0	0	0	0	0	0	0	0	0	0	0	0	0	0	0
88	MFI	0	1	0	1	0	0	0	1	0	0	0	1	0	0	0	1	0	0	0	0	0	0	0	0	0	0	0	0	0	0	0	0	0	0	0	0	0	0	0	0	0	0	0	0	0	0	0	0
89	MFI	0	1	0	1	0	0	1	1	0	0	0	0	0	0	0	1	1	0	0	0	1	0	1	1	0	0	0	0	0	0	0	1	0	0	0	0	0	0	0	0	0	0	0	0	0	0	0	0
89	MFI	0	1	0	1	0	0	1	1	0	0	0	0	0	0	0	1	1	0	0	0	1	0	1	1	0	0	0	0	0	0	0	1	0	0	0	0	0	0	0	0	0	0	0	0	0	0	0	0
122	MFI	0	1	1	0	0	0	0	1	0	1	0	1	1	1	0	1	1	0	1	1	0	1	0	1	0	1	1	0	0	0	1	0	1	1	0	1	1	0	0	1	0	0	0	1	0	0	0	0
122	MFI	0	1	1	0	0	0	0	1	0	1	0	1	1	1	0	1	1	0	1	1	0	1	0	1	0	1	1	0	0	0	1	0	1	1	0	1	1	0	0	1	0	0	0	1	0	0	0	0
123	MFI	0	1	1	0	0	1	0	1	0	1	0	1	1	1	0	1	1	1	1	1	0	1	0	1	0	1	1	0	1	0	1	0	1	1	0	1	1	1	0	1	0	0	0	1	0	0	0	0
123	MFI	0	1	1	0	0	1	0	1	0	1	0	1	1	1	0	1	1	1	1	1	0	1	0	1	0	1	1	0	1	0	1	0	1	1	0	1	1	1	0	1	0	0	0	1	0	0	0	0
124	MFI	0	1	1	0	0	1	0	1	0	1	1	1	1	1	0	1	1	1	1	1	0	1	0	1	0	1	1	0	1	0	1	0	1	1	0	1	1	0	0	1	0	0	0	1	0	0	0	0
124	MFI	0	1	1	0	0	1	0	1	0	1	1	1	1	1	0	1	1	1	1	1	0	1	0	1	0	1	1	0	1	0	1	0	1	1	0	1	1	0	0	1	0	0	0	1	0	0	0	0
125	MFI	0	1	1	0	0	1	0	1	0	1	0	1	1	1	0	1	1	1	1	1	0	1	0	1	0	1	1	0	1	0	1	0	1	1	0	1	1	0	0	1	0	0	0	1	0	0	0	0
125	MFI	0	1	1	0	0	1	0	1	0	1	0	1	1	1	0	1	1	1	1	1	0	1	0	1	0	1	1	0	1	0	1	0	1	1	0	1	1	0	0	1	0	0	0	1	0	0	0	0
262	MFI	0	1	1	0	0	1	0	1	0	1	0	1	1	1	0	1	1	1	1	1	0	1	0	1	0	1	1	0	0	0	0	0	0	1	0	0	1	1	0	1	0	0	1	1	1	0	0	0
262	MFI	0	1	1	0	0	1	0	1	0	1	0	1	1	1	0	1	1	1	1	1	0	1	0	1	0	1	1	0	0	0	0	0	0	1	0	0	1	1	0	1	0	0	1	1	1	0	0	0
263	MFI	0	1	1	0	0	1	0	1	0	1	0	1	1	1	0	1	1	1	1	1	0	1	0	1	0	1	1	0	0	0	0	0	0	1	0	0	1	0	0	1	0	0	1	1	1	0	0	0
263	MFI	0	1	1	0	0	1	0	1	0	1	0	1	1	1	0	1	1	1	1	1	0	1	0	1	0	1	1	0	0	0	0	0	0	1	0	0	1	0	0	1	0	0	1	1	1	0	0	0
96	F1	0	1	1	0	0	1	0	1	0	1	0	1	1	1	0	1	0	0	1	1	0	1	0	0	0	1	0	0	0	0	0	0	0	0	0	0	1	0	0	1	0	0	0	0	0	0	0	0
96	F1	0	1	1	0	0	1	0	1	0	1	0	1	1	1	0	1	0	0	1	1	0	1	0	0	0	1	0	0	0	0	0	0	0	0	0	0	1	0	0	1	0	0	0	0	0	0	0	0
97	F1	1	1	1	0	0	0	0	1	0	1	0	1	0	1	0	1	1	0	1	1	0	1	0	0	0	0	1	0	0	0	0	0	0	1	0	0	0	0	0	1	0	0	0	0	0	0	0	0
97	F1	1	1	1	0	0	0	0	1	0	1	0	1	0	1	0	1	1	0	1	1	0	1	0	0	0	0	1	0	0	0	0	0	0	1	0	0	0	0	0	1	0	0	0	0	0	0	0	0
239	F1	0	0	0	0	0	0	0	1	0	0	0	0	0	0	0	1	0	0	0	0	0	0	0	0	0	0	0	0	0	0	0	0	0	0	0	0	0	0	0	0	0	0	0	0	0	0	0	0
239	F1	0	0	0	0	0	0	0	1	0	0	0	0	0	0	0	1	0	0	0	0	0	0	0	0	0	0	0	0	0	0	0	0	0	0	0	0	0	0	0	0	0	0	0	0	0	0	0	0
240	F1	0	1	1	0	0	0	0	1	1	1	0	1	1	1	1	1	0	0	1	1	0	1	0	0	0	0	0	0	0	0	0	0	0	0	0	0	0	0	0	0	0	0	0	0	0	0	0	0
240	F1	0	1	1	0	0	0	0	1	1	1	0	1	1	1	1	1	0	0	1	1	0	1	0	0	0	0	0	0	0	0	0	0	0	0	0	0	0	0	0	0	0	0	0	0	0	0	0	0
256	F1	0	1	1	0	0	1	0	1	0	1	0	1	1	1	0	1	0	1	1	1	0	1	0	1	0	1	1	0	0	0	0	0	1	1	0	0	1	0	0	1	0	0	0	1	0	0	0	0
256	F1	0	1	1	0	0	1	0	1	0	1	0	1	1	1	0	1	0	1	1	1	0	1	0	1	0	1	1	0	0	0	0	0	1	1	0	0	1	0	0	1	0	0	0	1	0	0	0	0
257	F1	0	1	1	0	0	1	0	1	0	1	0	1	1	1	0	1	1	1	1	1	0	1	0	1	0	1	1	0	0	0	0	0	1	1	0	0	1	1	0	1	0	1	1	1	1	0	0	0
257	F1	0	1	1	0	0	1	0	1	0	1	0	1	1	1	0	1	1	1	1	1	0	1	0	1	0	1	1	0	0	0	0	0	1	1	0	0	1	1	0	1	0	1	1	1	1	0	0	0
271	F1	0	1	1	0	0	0	0	1	0	1	0	1	0	1	0	1	0	0	1	1	0	1	0	0	0	0	0	0	0	0	0	0	0	0	0	0	0	0	0	0	0	0	0	0	0	0	0	0
271	F1	0	1	1	0	0	0	0	1	0	1	0	1	0	1	0	1	0	0	1	1	0	1	0	0	0	0	0	0	0	0	0	0	0	0	0	0	0	0	0	0	0	0	0	0	0	0	0	0
272	F1	0	1	1	0	0	0	0	1	0	0	0	1	0	0	0	0	0	0	0	0	0	0	0	0	0	0	0	0	0	0	0	0	0	0	0	0	0	0	0	0	0	0	0	0	0	0	0	0
272	F1	0	1	1	0	0	0	0	1	0	0	0	1	0	0	0	0	0	0	0	0	0	0	0	0	0	0	0	0	0	0	0	0	0	0	0	0	0	0	0	0	0	0	0	0	0	0	0	0
286	F1	0	1	1	0	0	0	0	1	0	0	1	1	0	1	0	1	0	1	1	1	0	1	0	0	0	1	0	0	0	0	0	0	0	0	0	0	1	0	0	1	0	0	0	0	0	0	0	0
286	F1	0	1	1	0	0	0	0	1	0	0	1	1	0	1	0	1	0	1	1	1	0	1	0	0	0	1	0	0	0	0	0	0	0	0	0	0	1	0	0	1	0	0	0	0	0	0	0	0
287	F1	0	1	1	0	0	0	0	1	0	1	1	1	0	1	0	1	0	1	1	1	0	1	0	1	0	1	0	0	0	0	0	0	0	1	0	0	1	0	0	1	0	0	0	0	0	0	0	0
287	F1	0	1	1	0	0	0	0	1	0	1	1	1	0	1	0	1	0	1	1	1	0	1	0	1	0	1	0	0	0	0	0	0	0	1	0	0	1	0	0	1	0	0	0	0	0	0	0	0
301	F1	0	1	1	0	0	1	0	1	0	1	0	1	0	1	0	1	1	1	1	1	0	1	0	1	0	1	1	0	0	1	0	0	1	1	0	0	1	0	0	1	1	1	1	0	1	0	0	0
301	F1	0	1	1	0	0	1	0	1	0	1	0	1	0	1	0	1	1	1	1	1	0	1	0	1	0	1	1	0	0	1	0	0	1	1	0	0	1	0	0	1	1	1	1	0	1	0	0	0
302	F1	0	1	1	0	0	1	0	1	0	1	0	1	1	1	0	1	1	1	1	1	0	1	0	1	0	1	1	0	0	1	0	0	1	1	0	1	1	0	0	1	1	1	1	0	1	1	0	0
302	F1	0	1	1	0	0	1	0	1	0	1	0	1	1	1	0	1	1	1	1	1	0	1	0	1	0	1	1	0	0	1	0	0	1	1	0	1	1	0	0	1	1	1	1	0	1	1	0	0
316	F1	0	1	1	0	0	0	0	1	0	1	0	1	1	1	1	1	1	0	1	1	0	1	0	0	0	0	1	0	0	1	0	0	1	1	0	1	1	0	1	1	0	1	0	1	0	0	0	0
316	F1	0	1	1	0	0	0	0	1	0	1	0	1	1	1	1	1	1	0	1	1	0	1	0	0	0	0	1	0	0	1	0	0	1	1	0	1	1	0	1	1	0	1	0	1	0	0	0	0
317	F1	0	1	1	0	0	0	0	1	0	1	0	1	1	1	1	1	1	1	1	1	0	1	0	0	0	1	1	0	0	1	1	0	1	1	0	1	1	1	0	1	0	0	0	1	0	0	0	0
317	F1	0	1	1	0	0	0	0	1	0	1	0	1	1	1	1	1	1	1	1	1	0	1	0	0	0	1	1	0	0	1	1	0	1	1	0	1	1	1	0	1	0	0	0	1	0	0	0	0
331	F1	0	1	1	0	0	0	0	1	0	1	0	1	1	1	0	1	1	1	1	1	0	1	0	1	1	1	1	0	0	1	1	0	1	1	0	1	1	0	0	1	1	1	0	1	0	0	0	0
331	F1	0	1	1	0	0	0	0	1	0	1	0	1	1	1	0	1	1	1	1	1	0	1	0	1	1	1	1	0	0	1	1	0	1	1	0	1	1	0	0	1	1	1	0	1	0	0	0	0
332	F1	0	1	1	0	0	0	0	1	0	1	0	1	1	1	0	1	1	1	1	1	0	1	0	1	1	1	1	0	1	1	1	0	1	1	0	1	1	1	0	1	1	1	1	1	0	0	0	0
332	F1	0	1	1	0	0	0	0	1	0	1	0	1	1	1	0	1	1	1	1	1	0	1	0	1	1	1	1	0	1	1	1	0	1	1	0	1	1	1	0	1	1	1	1	1	0	0	0	0
346	F1	0	1	1	0	0	0	0	1	0	0	0	1	1	0	0	1	1	1	1	1	0	1	0	0	0	0	1	0	0	0	0	0	0	0	1	0	1	0	0	1	0	0	0	0	0	0	0	0
346	F1	0	1	1	0	0	0	0	1	0	0	0	1	1	0	0	1	1	1	1	1	0	1	0	0	0	0	1	0	0	0	0	0	0	0	1	0	1	0	0	1	0	0	0	0	0	0	0	0
347	F1	0	1	1	0	0	0	0	1	0	1	0	1	1	1	0	1	1	1	1	1	0	1	0	0	1	0	1	0	1	0	1	0	0	1	0	1	1	1	0	1	0	1	1	1	0	0	0	0
347	F1	0	1	1	0	0	0	0	1	0	1	0	1	1	1	0	1	1	1	1	1	0	1	0	0	1	0	1	0	1	0	1	0	0	1	0	1	1	1	0	1	0	1	1	1	0	0	0	0
361	F1	0	1	1	0	0	0	0	1	0	1	0	1	1	1	0	1	1	1	1	1	0	1	0	0	0	0	1	0	0	0	0	0	0	1	0	0	1	0	0	1	0	1	1	0	1	0	0	0
361	F1	0	1	1	0	0	0	0	1	0	1	0	1	1	1	0	1	1	1	1	1	0	1	0	0	0	0	1	0	0	0	0	0	0	1	0	0	1	0	0	1	0	1	1	0	1	0	0	0
362	F1	1	1	1	0	0	1	0	1	0	1	0	1	1	1	0	1	1	1	1	1	0	1	0	1	0	1	1	0	0	1	0	0	1	1	0	0	1	0	0	1	1	1	1	0	1	1	1	0
362	F1	1	1	1	0	0	1	0	1	0	1	0	1	1	1	0	1	1	1	1	1	0	1	0	1	0	1	1	0	0	1	0	0	1	1	0	0	1	0	0	1	1	1	1	0	1	1	1	0
376	F1	1	1	1	0	0	0	0	1	0	0	0	1	0	1	0	1	0	1	1	1	0	1	0	0	0	0	0	0	0	0	0	0	0	1	0	0	1	0	0	1	0	1	1	0	0	0	0	0
376	F1	1	1	1	0	0	0	0	1	0	0	0	1	0	1	0	1	0	1	1	1	0	1	0	0	0	0	0	0	0	0	0	0	0	1	0	0	1	0	0	1	0	1	1	0	0	0	0	0
377	F1	1	1	1	0	0	0	0	1	0	0	0	1	0	1	0	1	0	0	1	1	0	1	0	0	0	0	0	0	0	1	0	0	0	1	0	0	1	0	1	1	0	1	1	0	1	0	0	0
377	F1	1	1	1	0	0	0	0	1	0	0	0	1	0	1	0	1	0	0	1	1	0	1	0	0	0	0	0	0	0	1	0	0	0	1	0	0	1	0	1	1	0	1	1	0	1	0	0	0
391	F1	1	1	1	0	0	0	0	1	1	1	0	1	1	1	0	1	1	1	1	1	0	1	0	1	0	1	1	0	0	0	1	0	1	1	0	1	1	1	1	1	0	0	1	1	0	0	0	0
391	F1	1	1	1	0	0	0	0	1	1	1	0	1	1	1	0	1	1	1	1	1	0	1	0	1	0	1	1	0	0	0	1	0	1	1	0	1	1	1	1	1	0	0	1	1	0	0	0	0
392	F1	1	1	1	0	0	1	0	1	1	1	0	1	1	1	0	1	1	1	1	1	0	1	0	1	1	0	1	0	1	0	1	0	0	1	0	1	1	0	0	1	0	0	0	1	1	0	0	1
392	F1	1	1	1	0	0	1	0	1	1	1	0	1	1	1	0	1	1	1	1	1	0	1	0	1	1	0	1	0	1	0	1	0	0	1	0	1	1	0	0	1	0	0	0	1	1	0	0	1
393	F1	0	0	0	0	0	0	0	1	1	1	0	1	1	1	1	1	1	1	1	1	0	1	0	0	0	0	1	0	0	0	0	0	0	1	0	0	0	0	0	1	0	0	0	1	0	0	0	0
393	F1	0	0	0	0	0	0	0	1	1	1	0	1	1	1	1	1	1	1	1	1	0	1	0	0	0	0	1	0	0	0	0	0	0	1	0	0	0	0	0	1	0	0	0	1	0	0	0	0
422	F1	1	1	1	0	0	0	0	1	1	1	0	1	1	1	0	1	1	1	1	1	0	1	0	1	1	0	1	0	1	0	1	0	0	1	0	1	1	0	0	1	0	1	0	1	1	0	0	1
422	F1	1	1	1	0	0	0	0	1	1	1	0	1	1	1	0	1	1	1	1	1	0	1	0	1	1	0	1	0	1	0	1	0	0	1	0	1	1	0	0	1	0	1	0	1	1	0	0	1
98	F2	0	1	1	1	0	0	0	1	1	1	0	1	0	1	0	1	1	0	1	1	0	1	0	0	0	0	1	0	0	0	0	0	0	0	0	0	0	0	0	1	0	0	0	0	0	0	0	0
98	F2	0	1	1	1	0	0	0	1	1	1	0	1	0	1	0	1	1	0	1	1	0	1	0	0	0	0	1	0	0	0	0	0	0	0	0	0	0	0	0	1	0	0	0	0	0	0	0	0
99	F2	0	1	1	1	0	0	0	1	0	1	0	1	0	1	0	1	1	0	1	1	0	1	1	0	0	0	1	0	0	0	0	0	0	1	0	1	0	1	0	1	0	0	0	1	0	0	0	0
99	F2	0	1	1	1	0	0	0	1	0	1	0	1	0	1	0	1	1	0	1	1	0	1	1	0	0	0	1	0	0	0	0	0	0	1	0	1	0	1	0	1	0	0	0	1	0	0	0	0
241	F2	0	1	1	0	0	1	0	1	1	1	0	1	1	1	0	1	1	1	1	1	0	1	0	0	0	1	1	0	0	0	1	0	0	1	0	1	1	0	0	1	0	0	0	1	0	0	0	0
241	F2	0	1	1	0	0	1	0	1	1	1	0	1	1	1	0	1	1	1	1	1	0	1	0	0	0	1	1	0	0	0	1	0	0	1	0	1	1	0	0	1	0	0	0	1	0	0	0	0
242	F2	0	1	1	0	0	0	0	1	1	1	0	1	1	1	0	1	1	1	1	1	0	1	0	1	1	1	1	0	1	0	1	0	0	1	0	1	1	0	0	1	0	0	0	1	0	0	0	0
242	F2	0	1	1	0	0	0	0	1	1	1	0	1	1	1	0	1	1	1	1	1	0	1	0	1	1	1	1	0	1	0	1	0	0	1	0	1	1	0	0	1	0	0	0	1	0	0	0	0
258	F2	1	1	1	0	0	1	0	1	0	1	0	1	1	1	0	1	1	1	1	1	0	1	0	1	0	1	1	0	0	0	0	0	1	1	0	0	1	0	0	1	0	0	1	1	1	0	0	0
258	F2	1	1	1	0	0	1	0	1	0	1	0	1	1	1	0	1	1	1	1	1	0	1	0	1	0	1	1	0	0	0	0	0	1	1	0	0	1	0	0	1	0	0	1	1	1	0	0	0
259	F2	1	1	1	0	0	1	0	1	0	1	0	1	0	1	0	1	0	0	1	1	0	1	0	0	0	1	0	0	0	0	0	0	0	0	0	0	1	0	0	1	0	0	0	0	0	0	0	0
259	F2	1	1	1	0	0	1	0	1	0	1	0	1	0	1	0	1	0	0	1	1	0	1	0	0	0	1	0	0	0	0	0	0	0	0	0	0	1	0	0	1	0	0	0	0	0	0	0	0
273	F2	0	1	1	0	0	1	0	1	0	1	0	1	0	1	0	1	0	0	1	1	0	1	0	0	0	0	0	0	0	0	0	0	0	0	0	0	0	0	0	0	0	0	0	0	0	0	0	0
273	F2	0	1	1	0	0	1	0	1	0	1	0	1	0	1	0	1	0	0	1	1	0	1	0	0	0	0	0	0	0	0	0	0	0	0	0	0	0	0	0	0	0	0	0	0	0	0	0	0
274	F2	0	1	1	0	0	0	0	1	0	0	0	1	0	1	0	1	0	0	1	0	0	1	0	0	0	0	0	0	0	0	0	0	0	0	0	0	0	0	0	0	0	0	0	0	0	0	0	0
274	F2	0	1	1	0	0	0	0	1	0	0	0	1	0	1	0	1	0	0	1	0	0	1	0	0	0	0	0	0	0	0	0	0	0	0	0	0	0	0	0	0	0	0	0	0	0	0	0	0
288	F2	0	1	1	0	0	0	0	1	0	0	0	1	0	1	0	1	0	1	1	1	0	1	0	0	0	1	0	0	0	0	0	0	0	1	0	0	1	0	0	1	0	0	1	0	0	0	0	0
288	F2	0	1	1	0	0	0	0	1	0	0	0	1	0	1	0	1	0	1	1	1	0	1	0	0	0	1	0	0	0	0	0	0	0	1	0	0	1	0	0	1	0	0	1	0	0	0	0	0
289	F2	1	1	1	0	0	1	0	1	0	1	1	1	0	1	0	1	0	1	1	1	0	1	0	1	0	1	0	0	0	0	0	0	0	1	0	0	1	0	0	1	0	0	0	0	0	0	0	0
289	F2	1	1	1	0	0	1	0	1	0	1	1	1	0	1	0	1	0	1	1	1	0	1	0	1	0	1	0	0	0	0	0	0	0	1	0	0	1	0	0	1	0	0	0	0	0	0	0	0
303	F2	1	1	1	0	0	1	0	1	0	1	0	1	1	1	0	1	1	1	1	1	0	1	0	1	0	1	1	0	0	1	0	0	1	1	0	0	1	0	1	1	1	1	1	0	1	0	0	1
303	F2	1	1	1	0	0	1	0	1	0	1	0	1	1	1	0	1	1	1	1	1	0	1	0	1	0	1	1	0	0	1	0	0	1	1	0	0	1	0	1	1	1	1	1	0	1	0	0	1
304	F2	0	1	1	0	0	1	0	1	0	1	0	1	1	1	0	1	0	1	1	1	0	1	0	1	0	1	1	0	0	1	0	0	1	1	0	0	1	0	0	1	1	1	1	0	1	1	0	1
304	F2	0	1	1	0	0	1	0	1	0	1	0	1	1	1	0	1	0	1	1	1	0	1	0	1	0	1	1	0	0	1	0	0	1	1	0	0	1	0	0	1	1	1	1	0	1	1	0	1
318	F2	0	1	1	0	0	0	0	1	0	1	0	1	1	1	0	1	1	1	1	1	0	1	0	1	1	1	1	0	0	1	1	0	1	1	0	1	1	0	0	1	1	1	0	1	0	0	0	0
318	F2	0	1	1	0	0	0	0	1	0	1	0	1	1	1	0	1	1	1	1	1	0	1	0	1	1	1	1	0	0	1	1	0	1	1	0	1	1	0	0	1	1	1	0	1	0	0	0	0
319	F2	0	1	1	0	0	0	0	1	0	1	0	1	1	1	0	1	1	1	1	1	0	1	0	1	1	1	1	0	1	1	1	0	1	1	0	1	1	1	1	1	1	1	1	1	0	0	0	0
319	F2	0	1	1	0	0	0	0	1	0	1	0	1	1	1	0	1	1	1	1	1	0	1	0	1	1	1	1	0	1	1	1	0	1	1	0	1	1	1	1	1	1	1	1	1	0	0	0	0
333	F2	0	1	1	0	0	0	0	1	0	1	0	1	1	1	0	1	1	0	1	1	0	1	0	1	1	1	1	0	1	1	1	0	1	1	0	1	1	1	0	1	1	1	1	1	0	0	0	0
333	F2	0	1	1	0	0	0	0	1	0	1	0	1	1	1	0	1	1	0	1	1	0	1	0	1	1	1	1	0	1	1	1	0	1	1	0	1	1	1	0	1	1	1	1	1	0	0	0	0
334	F2	0	1	1	0	0	0	0	1	0	1	0	1	1	1	0	1	1	1	1	1	0	1	0	1	1	1	1	0	0	1	1	0	1	1	0	1	1	0	0	1	1	1	0	1	0	0	0	1
334	F2	0	1	1	0	0	0	0	1	0	1	0	1	1	1	0	1	1	1	1	1	0	1	0	1	1	1	1	0	0	1	1	0	1	1	0	1	1	0	0	1	1	1	0	1	0	0	0	1
348	F2	0	1	1	0	0	0	0	1	1	1	0	1	1	1	0	1	1	0	1	1	0	1	0	0	1	0	1	0	1	0	1	0	0	1	0	1	1	1	0	1	0	0	0	1	0	0	0	0
348	F2	0	1	1	0	0	0	0	1	1	1	0	1	1	1	0	1	1	0	1	1	0	1	0	0	1	0	1	0	1	0	1	0	0	1	0	1	1	1	0	1	0	0	0	1	0	0	0	0
349	F2	0	1	1	0	0	0	0	1	0	1	0	1	1	1	0	1	1	1	1	1	0	1	0	0	1	0	1	0	0	0	1	0	0	1	0	1	1	0	0	1	0	0	0	1	0	0	0	0
349	F2	0	1	1	0	0	0	0	1	0	1	0	1	1	1	0	1	1	1	1	1	0	1	0	0	1	0	1	0	0	0	1	0	0	1	0	1	1	0	0	1	0	0	0	1	0	0	0	0
363	F2	0	1	1	0	0	0	0	1	0	1	1	1	0	1	0	1	1	1	1	1	0	1	0	1	0	1	1	0	0	1	0	0	1	1	0	0	1	1	0	1	1	1	1	0	1	1	0	0
363	F2	0	1	1	0	0	0	0	1	0	1	1	1	0	1	0	1	1	1	1	1	0	1	0	1	0	1	1	0	0	1	0	0	1	1	0	0	1	1	0	1	1	1	1	0	1	1	0	0
364	F2	0	1	1	0	0	0	0	1	0	1	0	1	0	1	0	1	1	1	1	1	0	1	0	1	0	1	1	0	0	1	0	0	1	1	0	0	1	1	0	1	1	1	1	1	1	1	0	1
364	F2	0	1	1	0	0	0	0	1	0	1	0	1	0	1	0	1	1	1	1	1	0	1	0	1	0	1	1	0	0	1	0	0	1	1	0	0	1	1	0	1	1	1	1	1	1	1	0	1
100	F3	0	1	1	1	0	0	0	1	0	1	0	1	0	1	0	1	1	0	1	1	0	1	0	0	0	0	0	0	0	0	0	0	0	0	0	0	0	0	0	0	0	0	0	0	0	0	0	0
100	F3	0	1	1	1	0	0	0	1	0	1	0	1	0	1	0	1	1	0	1	1	0	1	0	0	0	0	0	0	0	0	0	0	0	0	0	0	0	0	0	0	0	0	0	0	0	0	0	0
101	F3	0	1	1	0	0	1	0	1	0	1	0	1	1	1	1	1	1	0	1	1	0	1	0	0	0	1	1	0	0	0	0	0	0	0	0	0	1	0	0	1	0	0	0	0	0	0	0	0
101	F3	0	1	1	0	0	1	0	1	0	1	0	1	1	1	1	1	1	0	1	1	0	1	0	0	0	1	1	0	0	0	0	0	0	0	0	0	1	0	0	1	0	0	0	0	0	0	0	0
260	F3	0	1	1	0	0	1	0	1	0	1	0	1	1	1	0	1	1	1	1	1	0	1	0	1	0	1	1	0	0	0	0	0	1	1	0	1	1	0	1	1	0	0	1	0	1	0	0	0
260	F3	0	1	1	0	0	1	0	1	0	1	0	1	1	1	0	1	1	1	1	1	0	1	0	1	0	1	1	0	0	0	0	0	1	1	0	1	1	0	1	1	0	0	1	0	1	0	0	0
261	F3	0	0	1	0	1	0	0	0	0	0	0	0	0	1	0	0	0	0	0	0	0	1	0	0	0	0	0	0	0	0	0	0	0	0	0	0	0	0	0	0	0	0	0	0	0	0	0	0
261	F3	0	0	1	0	1	0	0	0	0	0	0	0	0	1	0	0	0	0	0	0	0	1	0	0	0	0	0	0	0	0	0	0	0	0	0	0	0	0	0	0	0	0	0	0	0	0	0	0
275	F3	0	1	1	0	0	0	0	1	0	1	0	1	0	1	0	1	0	0	1	1	0	1	0	0	0	0	0	0	0	0	0	0	0	0	0	0	0	0	0	0	0	0	0	0	0	0	0	0
275	F3	0	1	1	0	0	0	0	1	0	1	0	1	0	1	0	1	0	0	1	1	0	1	0	0	0	0	0	0	0	0	0	0	0	0	0	0	0	0	0	0	0	0	0	0	0	0	0	0
276	F3	0	1	1	0	0	1	0	1	0	1	0	1	0	1	0	1	0	0	1	1	0	1	0	0	0	0	0	0	0	0	0	0	0	0	0	0	0	0	0	0	0	0	0	0	0	0	0	0
276	F3	0	1	1	0	0	1	0	1	0	1	0	1	0	1	0	1	0	0	1	1	0	1	0	0	0	0	0	0	0	0	0	0	0	0	0	0	0	0	0	0	0	0	0	0	0	0	0	0
290	F3	1	1	1	0	0	0	0	1	0	1	1	1	0	1	0	1	0	1	1	1	0	1	0	0	0	1	0	0	0	0	0	0	0	1	0	0	1	0	0	1	0	0	0	0	0	0	0	0
290	F3	1	1	1	0	0	0	0	1	0	1	1	1	0	1	0	1	0	1	1	1	0	1	0	0	0	1	0	0	0	0	0	0	0	1	0	0	1	0	0	1	0	0	0	0	0	0	0	0
291	F3	1	1	1	0	0	0	0	1	0	1	1	1	0	1	0	1	0	1	1	1	0	1	0	1	0	0	0	0	0	0	0	0	0	1	0	0	1	0	0	1	0	0	0	0	0	0	0	0
291	F3	1	1	1	0	0	0	0	1	0	1	1	1	0	1	0	1	0	1	1	1	0	1	0	1	0	0	0	0	0	0	0	0	0	1	0	0	1	0	0	1	0	0	0	0	0	0	0	0
305	F3	0	1	1	0	0	1	0	1	0	1	0	1	1	1	0	1	1	1	1	1	0	1	0	1	0	0	1	0	0	1	0	0	1	1	0	0	1	1	1	1	1	1	1	0	1	1	0	0
305	F3	0	1	1	0	0	1	0	1	0	1	0	1	1	1	0	1	1	1	1	1	0	1	0	1	0	0	1	0	0	1	0	0	1	1	0	0	1	1	1	1	1	1	1	0	1	1	0	0
306	F3	0	1	1	0	0	0	0	1	0	1	0	1	1	1	0	1	1	1	1	1	0	1	0	1	0	1	1	0	0	1	0	0	1	1	0	0	1	1	1	1	1	1	1	0	1	1	0	0
306	F3	0	1	1	0	0	0	0	1	0	1	0	1	1	1	0	1	1	1	1	1	0	1	0	1	0	1	1	0	0	1	0	0	1	1	0	0	1	1	1	1	1	1	1	0	1	1	0	0
320	F3	0	1	1	0	0	0	0	1	0	1	0	1	1	1	0	1	1	1	1	1	0	1	0	1	1	0	1	0	1	1	1	0	1	1	0	1	1	0	1	1	1	1	0	1	0	0	0	0
320	F3	0	1	1	0	0	0	0	1	0	1	0	1	1	1	0	1	1	1	1	1	0	1	0	1	1	0	1	0	1	1	1	0	1	1	0	1	1	0	1	1	1	1	0	1	0	0	0	0
321	F3	0	1	1	0	0	0	0	1	0	1	0	1	1	1	0	1	1	1	1	1	0	1	0	1	1	1	1	0	1	1	1	0	1	1	0	1	1	0	0	1	0	1	0	1	0	0	0	0
321	F3	0	1	1	0	0	0	0	1	0	1	0	1	1	1	0	1	1	1	1	1	0	1	0	1	1	1	1	0	1	1	1	0	1	1	0	1	1	0	0	1	0	1	0	1	0	0	0	0
335	F3	1	1	1	0	0	0	0	1	0	1	0	1	1	1	0	1	1	1	1	1	0	1	0	1	1	1	1	0	0	1	1	0	1	1	0	1	1	0	0	1	1	1	1	1	0	0	0	0
335	F3	1	1	1	0	0	0	0	1	0	1	0	1	1	1	0	1	1	1	1	1	0	1	0	1	1	1	1	0	0	1	1	0	1	1	0	1	1	0	0	1	1	1	1	1	0	0	0	0
336	F3	0	1	1	0	0	0	0	1	0	1	0	1	1	1	0	1	1	1	1	1	0	1	0	1	1	1	1	0	1	1	1	0	1	1	0	1	1	1	0	1	1	1	0	1	0	0	0	0
336	F3	0	1	1	0	0	0	0	1	0	1	0	1	1	1	0	1	1	1	1	1	0	1	0	1	1	1	1	0	1	1	1	0	1	1	0	1	1	1	0	1	1	1	0	1	0	0	0	0
350	F3	1	1	1	0	0	0	0	1	0	1	0	1	1	1	1	1	1	1	1	1	0	1	0	0	1	0	1	0	0	0	1	0	0	1	0	1	1	0	0	1	0	0	1	1	0	0	0	0
350	F3	1	1	1	0	0	0	0	1	0	1	0	1	1	1	1	1	1	1	1	1	0	1	0	0	1	0	1	0	0	0	1	0	0	1	0	1	1	0	0	1	0	0	1	1	0	0	0	0
351	F3	0	1	1	0	0	0	0	1	1	1	0	1	1	1	0	1	1	1	1	1	0	1	0	0	1	0	1	0	1	0	1	0	0	1	0	1	1	0	1	1	0	0	0	1	0	0	0	0
351	F3	0	1	1	0	0	0	0	1	1	1	0	1	1	1	0	1	1	1	1	1	0	1	0	0	1	0	1	0	1	0	1	0	0	1	0	1	1	0	1	1	0	0	0	1	0	0	0	0
365	F3	0	1	1	0	0	1	0	1	0	1	1	1	1	1	0	1	0	1	1	1	0	1	0	1	0	1	1	0	0	1	0	0	1	1	0	0	1	0	1	1	1	1	1	0	1	1	0	0
365	F3	0	1	1	0	0	1	0	1	0	1	1	1	1	1	0	1	0	1	1	1	0	1	0	1	0	1	1	0	0	1	0	0	1	1	0	0	1	0	1	1	1	1	1	0	1	1	0	0
366	F3	0	1	1	0	0	0	0	1	1	1	0	1	0	1	0	1	1	0	1	1	0	1	0	0	0	0	0	0	0	0	0	0	0	1	0	0	0	0	0	1	0	0	1	0	0	0	0	0
366	F3	0	1	1	0	0	0	0	1	1	1	0	1	0	1	0	1	1	0	1	1	0	1	0	0	0	0	0	0	0	0	0	0	0	1	0	0	0	0	0	1	0	0	1	0	0	0	0	0
378	F3	0	1	1	0	0	0	0	1	0	0	0	1	0	1	0	1	0	1	1	1	0	1	0	0	0	1	0	0	0	1	0	0	0	1	0	0	1	0	0	1	0	1	1	0	0	0	0	0
378	F3	0	1	1	0	0	0	0	1	0	0	0	1	0	1	0	1	0	1	1	1	0	1	0	0	0	1	0	0	0	1	0	0	0	1	0	0	1	0	0	1	0	1	1	0	0	0	0	0
379	F3	0	1	1	0	0	0	0	1	0	0	0	1	0	1	0	1	0	1	1	1	0	1	0	0	0	1	0	0	0	1	0	0	0	1	0	0	1	0	0	1	0	1	1	0	1	0	0	0
379	F3	0	1	1	0	0	0	0	1	0	0	0	1	0	1	0	1	0	1	1	1	0	1	0	0	0	1	0	0	0	1	0	0	0	1	0	0	1	0	0	1	0	1	1	0	1	0	0	0
380	F3	1	1	1	0	0	0	0	1	0	0	0	1	0	1	0	1	0	1	1	1	0	1	0	0	0	1	0	0	0	0	0	0	0	1	0	0	1	0	0	1	0	1	1	0	0	0	0	0
380	F3	1	1	1	0	0	0	0	1	0	0	0	1	0	1	0	1	0	1	1	1	0	1	0	0	0	1	0	0	0	0	0	0	0	1	0	0	1	0	0	1	0	1	1	0	0	0	0	0
[truncated: 77 more columns]

## Sheet: Leptodactylodon bicolor_AFLP
Lptodactylodon bicolor
EM3- Loci from primer combination ESP1B/MSP3
EM6- Loci from primer combination ESP1B/MSP6
ITEM_ID	LOCALITY	EM3_1	EM3_2	EM3_3	EM3_4	EM3_5	EM3_6	EM3_7	EM3_8	EM3_9	EM3_10	EM3_11	EM3_12	EM3_13	EM3_14	EM3_15	EM3_16	EM3_17	EM3_18	EM3_19	EM3_20	EM3_21	EM3_22	EM3_23	EM3_24	EM3_25	EM3_26	EM3_27	EM3_28	EM3_29	EM3_30	EM3_31	EM3_32	EM3_33	EM3_34	EM3_35	EM3_36	EM3_37	EM3_38	EM3_39	EM3_40	EM3_41	EM3_42	EM3_43	EM3_44	EM3_45	EM3_46	EM3_47	EM3_48
93	MFI	0	1	1	0	0	1	1	0	1	0	0	0	0	0	1	1	0	0	0	0	0	0	1	1	0	1	0	0	0	1	0	0	1	0	0	0	0	0	0	0	0	0	0	0	0	0	0	0
93	MFI	0	1	1	0	0	1	1	0	1	0	0	0	0	0	1	1	0	0	0	0	0	0	1	1	0	1	0	0	0	1	0	0	1	0	0	0	0	0	0	0	0	0	0	0	0	0	0	0
94	MFI	0	1	1	0	0	1	1	0	1	0	0	0	0	0	1	1	0	0	0	0	0	0	1	1	0	1	0	0	0	1	0	0	1	0	0	0	0	0	0	0	0	0	0	0	0	0	0	0
94	MFI	0	1	1	0	0	1	1	0	1	0	0	0	0	0	1	1	0	0	0	0	0	0	1	1	0	1	0	0	0	1	0	0	1	0	0	0	0	0	0	0	0	0	0	0	0	0	0	0
95	MFI	0	1	1	0	0	1	1	0	1	0	0	0	0	0	1	1	0	0	0	0	0	0	1	1	0	1	0	0	0	1	0	0	0	0	0	0	0	0	0	0	0	0	0	0	0	0	0	0
95	MFI	0	1	1	0	0	1	1	0	1	0	0	0	0	0	1	1	0	0	0	0	0	0	1	1	0	1	0	0	0	1	0	0	0	0	0	0	0	0	0	0	0	0	0	0	0	0	0	0
114	MFI	0	1	1	0	1	1	1	0	1	0	0	0	1	0	1	1	0	0	0	1	0	0	1	1	0	1	1	0	0	1	0	1	1	0	0	0	0	1	0	1	0	1	0	0	1	0	0	1
114	MFI	0	1	1	0	1	1	1	0	1	0	0	0	1	0	1	1	0	0	0	1	0	0	1	1	0	1	1	0	0	1	0	1	1	0	0	0	0	1	0	1	0	1	0	0	1	0	0	1
115	MFI	0	1	1	0	1	1	1	0	1	0	0	0	0	1	1	1	0	0	0	1	0	0	1	1	0	1	1	0	0	1	0	1	1	0	0	0	0	1	0	1	0	1	1	0	1	0	0	1
115	MFI	0	1	1	0	1	1	1	0	1	0	0	0	0	1	1	1	0	0	0	1	0	0	1	1	0	1	1	0	0	1	0	1	1	0	0	0	0	1	0	1	0	1	1	0	1	0	0	1
116	MFI	0	1	1	0	0	1	1	0	1	0	0	0	1	0	1	1	0	0	0	1	0	0	1	1	0	1	1	0	0	1	0	1	1	0	1	1	0	1	0	1	1	1	0	0	1	0	0	1
116	MFI	0	1	1	0	0	1	1	0	1	0	0	0	1	0	1	1	0	0	0	1	0	0	1	1	0	1	1	0	0	1	0	1	1	0	1	1	0	1	0	1	1	1	0	0	1	0	0	1
117	MFI	0	1	1	0	1	1	1	0	1	0	0	0	1	0	1	1	0	0	0	1	0	0	1	1	0	1	1	0	0	1	0	1	1	0	0	0	0	1	0	1	1	1	0	0	1	0	0	1
117	MFI	0	1	1	0	1	1	1	0	1	0	0	0	1	0	1	1	0	0	0	1	0	0	1	1	0	1	1	0	0	1	0	1	1	0	0	0	0	1	0	1	1	1	0	0	1	0	0	1
172	MFI	0	1	1	0	0	1	1	0	1	0	0	0	0	0	1	1	0	0	0	1	0	0	1	1	0	1	0	0	0	1	0	0	1	0	0	0	0	0	0	0	0	0	0	0	0	0	0	0
172	MFI	0	1	1	0	0	1	1	0	1	0	0	0	0	0	1	1	0	0	0	1	0	0	1	1	0	1	0	0	0	1	0	0	1	0	0	0	0	0	0	0	0	0	0	0	0	0	0	0
173	MFI	0	1	1	0	0	1	1	0	1	0	0	0	1	0	1	1	0	0	0	1	0	0	1	1	0	1	1	0	0	1	0	0	1	0	0	0	0	0	0	0	0	0	0	0	1	0	0	0
173	MFI	0	1	1	0	0	1	1	0	1	0	0	0	1	0	1	1	0	0	0	1	0	0	1	1	0	1	1	0	0	1	0	0	1	0	0	0	0	0	0	0	0	0	0	0	1	0	0	0
174	MFI	0	1	1	0	0	1	1	1	1	0	0	0	1	0	1	1	0	0	0	1	0	0	1	1	0	1	1	0	0	1	0	0	1	0	0	0	0	0	0	0	0	0	0	0	1	0	0	0
174	MFI	0	1	1	0	0	1	1	1	1	0	0	0	1	0	1	1	0	0	0	1	0	0	1	1	0	1	1	0	0	1	0	0	1	0	0	0	0	0	0	0	0	0	0	0	1	0	0	0
175	MFI	0	1	1	0	0	1	1	1	1	0	0	0	1	0	1	1	0	0	0	1	0	0	1	1	1	1	1	0	0	1	0	0	1	0	0	0	0	0	0	0	0	0	0	0	0	0	0	0
175	MFI	0	1	1	0	0	1	1	1	1	0	0	0	1	0	1	1	0	0	0	1	0	0	1	1	1	1	1	0	0	1	0	0	1	0	0	0	0	0	0	0	0	0	0	0	0	0	0	0
188	MFI	0	1	0	0	0	1	1	0	1	0	0	0	0	0	0	1	0	0	0	0	0	0	1	0	0	1	0	0	0	0	0	0	0	0	0	0	0	0	0	0	0	0	0	0	0	0	0	0
188	MFI	0	1	0	0	0	1	1	0	1	0	0	0	0	0	0	1	0	0	0	0	0	0	1	0	0	1	0	0	0	0	0	0	0	0	0	0	0	0	0	0	0	0	0	0	0	0	0	0
189	MFI	0	1	1	0	0	1	1	0	1	0	0	0	0	0	1	1	0	0	0	0	0	0	1	1	0	1	0	0	0	1	0	0	0	0	0	0	0	0	0	0	0	0	0	0	0	0	0	0
189	MFI	0	1	1	0	0	1	1	0	1	0	0	0	0	0	1	1	0	0	0	0	0	0	1	1	0	1	0	0	0	1	0	0	0	0	0	0	0	0	0	0	0	0	0	0	0	0	0	0
243	MFI	0	1	1	0	1	1	1	0	1	0	0	0	1	1	1	1	0	0	0	1	0	0	1	1	0	1	1	0	0	1	0	0	1	0	0	0	0	1	0	1	0	1	0	0	1	0	0	1
243	MFI	0	1	1	0	1	1	1	0	1	0	0	0	1	1	1	1	0	0	0	1	0	0	1	1	0	1	1	0	0	1	0	0	1	0	0	0	0	1	0	1	0	1	0	0	1	0	0	1
244	MFI	0	1	1	0	1	1	1	0	1	0	0	0	1	1	1	1	0	0	0	1	0	0	1	1	0	1	1	0	0	1	0	0	1	0	0	0	0	0	0	0	0	1	0	0	1	0	0	1
244	MFI	0	1	1	0	1	1	1	0	1	0	0	0	1	1	1	1	0	0	0	1	0	0	1	1	0	1	1	0	0	1	0	0	1	0	0	0	0	0	0	0	0	1	0	0	1	0	0	1
292	MFI	0	1	1	0	0	1	1	0	0	0	0	0	1	0	1	1	0	0	0	0	0	0	1	1	0	1	1	0	0	1	0	0	1	0	0	0	0	1	0	1	0	0	0	0	1	0	0	0
292	MFI	0	1	1	0	0	1	1	0	0	0	0	0	1	0	1	1	0	0	0	0	0	0	1	1	0	1	1	0	0	1	0	0	1	0	0	0	0	1	0	1	0	0	0	0	1	0	0	0
293	MFI	0	1	1	0	0	1	1	0	0	0	0	0	1	0	1	1	0	0	0	0	0	0	1	1	0	1	1	0	0	1	0	0	1	0	0	0	0	0	0	0	0	0	0	0	1	0	0	0
293	MFI	0	1	1	0	0	1	1	0	0	0	0	0	1	0	1	1	0	0	0	0	0	0	1	1	0	1	1	0	0	1	0	0	1	0	0	0	0	0	0	0	0	0	0	0	1	0	0	0
307	MFI	0	1	1	0	0	1	1	0	1	0	0	0	1	1	1	1	0	0	0	0	0	0	1	1	0	1	1	0	0	1	0	1	1	0	0	0	0	1	0	1	0	1	1	0	1	0	0	1
307	MFI	0	1	1	0	0	1	1	0	1	0	0	0	1	1	1	1	0	0	0	0	0	0	1	1	0	1	1	0	0	1	0	1	1	0	0	0	0	1	0	1	0	1	1	0	1	0	0	1
308	MFI	0	1	1	0	0	1	1	0	1	0	0	0	1	0	1	1	0	0	0	0	0	0	1	1	0	1	1	0	0	1	0	1	1	0	0	1	0	1	0	1	1	1	1	0	1	0	1	1
308	MFI	0	1	1	0	0	1	1	0	1	0	0	0	1	0	1	1	0	0	0	0	0	0	1	1	0	1	1	0	0	1	0	1	1	0	0	1	0	1	0	1	1	1	1	0	1	0	1	1
322	MFI	0	1	1	0	1	1	1	0	1	0	0	0	1	0	1	1	0	1	0	1	0	0	1	1	0	1	1	0	0	1	0	0	1	0	0	0	0	1	0	1	1	1	0	0	1	0	0	1
322	MFI	0	1	1	0	1	1	1	0	1	0	0	0	1	0	1	1	0	1	0	1	0	0	1	1	0	1	1	0	0	1	0	0	1	0	0	0	0	1	0	1	1	1	0	0	1	0	0	1
323	MFI	0	1	1	0	0	1	1	0	1	0	0	0	1	0	1	1	0	0	0	0	0	0	1	1	0	1	1	0	0	1	0	0	1	0	0	0	0	1	0	1	0	1	0	0	1	0	0	1
323	MFI	0	1	1	0	0	1	1	0	1	0	0	0	1	0	1	1	0	0	0	0	0	0	1	1	0	1	1	0	0	1	0	0	1	0	0	0	0	1	0	1	0	1	0	0	1	0	0	1
337	MFI	0	1	1	0	0	1	1	0	1	0	0	0	1	1	1	1	0	1	0	1	0	0	1	1	0	1	1	0	0	1	0	0	1	0	0	0	0	1	1	1	0	1	1	0	1	0	0	1
337	MFI	0	1	1	0	0	1	1	0	1	0	0	0	1	1	1	1	0	1	0	1	0	0	1	1	0	1	1	0	0	1	0	0	1	0	0	0	0	1	1	1	0	1	1	0	1	0	0	1
338	MFI	0	1	1	0	1	1	1	0	1	0	0	0	1	0	1	1	0	1	0	1	0	0	1	1	0	1	1	0	0	1	0	0	1	0	0	0	0	1	1	1	1	1	0	0	1	0	0	1
338	MFI	0	1	1	0	1	1	1	0	1	0	0	0	1	0	1	1	0	1	0	1	0	0	1	1	0	1	1	0	0	1	0	0	1	0	0	0	0	1	1	1	1	1	0	0	1	0	0	1
352	MFI	0	1	1	0	0	1	0	0	1	0	0	0	1	0	1	1	0	0	0	1	0	0	1	1	0	1	1	0	0	0	0	0	1	0	0	1	0	1	0	1	0	1	0	0	1	0	0	1
352	MFI	0	1	1	0	0	1	0	0	1	0	0	0	1	0	1	1	0	0	0	1	0	0	1	1	0	1	1	0	0	0	0	0	1	0	0	1	0	1	0	1	0	1	0	0	1	0	0	1
353	MFI	0	1	1	0	0	1	1	0	1	0	0	0	1	1	1	1	0	1	0	1	0	0	1	1	0	1	1	0	0	1	0	0	1	0	0	1	0	1	0	1	0	1	0	0	1	0	0	1
353	MFI	0	1	1	0	0	1	1	0	1	0	0	0	1	1	1	1	0	1	0	1	0	0	1	1	0	1	1	0	0	1	0	0	1	0	0	1	0	1	0	1	0	1	0	0	1	0	0	1
367	MFI	0	1	1	0	0	1	1	0	1	0	0	0	1	1	1	1	0	0	0	0	0	0	1	1	0	1	1	0	0	1	0	1	1	0	0	0	0	1	0	1	1	1	1	0	1	0	0	1
367	MFI	0	1	1	0	0	1	1	0	1	0	0	0	1	1	1	1	0	0	0	0	0	0	1	1	0	1	1	0	0	1	0	1	1	0	0	0	0	1	0	1	1	1	1	0	1	0	0	1
368	MFI	0	1	1	0	0	1	1	0	1	0	0	0	1	0	1	1	0	0	0	0	0	0	1	1	0	1	1	0	0	0	0	1	1	0	0	1	0	1	0	1	0	1	0	0	1	0	0	1
368	MFI	0	1	1	0	0	1	1	0	1	0	0	0	1	0	1	1	0	0	0	0	0	0	1	1	0	1	1	0	0	0	0	1	1	0	0	1	0	1	0	1	0	1	0	0	1	0	0	1
381	MFI	0	1	1	0	0	1	1	0	0	0	0	0	1	0	1	1	0	0	0	0	0	0	1	1	0	1	1	0	0	1	0	0	1	0	0	0	0	1	0	1	0	0	0	0	1	0	0	1
381	MFI	0	1	1	0	0	1	1	0	0	0	0	0	1	0	1	1	0	0	0	0	0	0	1	1	0	1	1	0	0	1	0	0	1	0	0	0	0	1	0	1	0	0	0	0	1	0	0	1
382	MFI	0	1	1	0	0	1	1	0	0	0	0	0	1	0	1	1	0	0	0	0	0	0	1	1	0	1	1	0	0	1	0	0	1	0	0	0	0	1	0	1	1	0	0	0	1	0	0	1
382	MFI	0	1	1	0	0	1	1	0	0	0	0	0	1	0	1	1	0	0	0	0	0	0	1	1	0	1	1	0	0	1	0	0	1	0	0	0	0	1	0	1	1	0	0	0	1	0	0	1
394	MFI	0	1	1	0	0	1	0	0	1	0	0	0	1	0	1	1	0	0	0	1	0	0	1	1	0	1	1	0	0	0	0	1	1	0	0	1	0	1	0	1	0	1	0	0	1	0	0	1
394	MFI	0	1	1	0	0	1	0	0	1	0	0	0	1	0	1	1	0	0	0	1	0	0	1	1	0	1	1	0	0	0	0	1	1	0	0	1	0	1	0	1	0	1	0	0	1	0	0	1
395	MFI	0	1	1	0	0	1	1	0	1	1	0	0	1	0	1	1	0	0	0	1	0	0	1	1	0	1	1	0	0	1	0	1	1	0	0	1	0	1	0	1	0	1	0	0	1	0	0	1
395	MFI	0	1	1	0	0	1	1	0	1	1	0	0	1	0	1	1	0	0	0	1	0	0	1	1	0	1	1	0	0	1	0	1	1	0	0	1	0	1	0	1	0	1	0	0	1	0	0	1
41	MFII	0	1	1	0	1	1	1	0	1	0	0	0	1	0	1	1	0	0	0	1	0	0	1	1	0	1	1	1	0	1	1	0	1	0	0	0	0	1	0	1	1	1	0	0	1	0	0	1
41	MFII	0	1	1	0	1	1	1	0	1	0	0	0	1	0	1	1	0	0	0	1	0	0	1	1	0	1	1	1	0	1	1	0	1	0	0	0	0	1	0	1	1	1	0	0	1	0	0	1
42	MFII	0	1	1	0	1	1	1	0	1	0	0	0	1	0	1	1	0	0	0	1	0	0	1	1	0	1	1	0	0	1	0	0	1	0	0	0	0	0	0	1	1	1	0	0	1	0	0	1
42	MFII	0	1	1	0	1	1	1	0	1	0	0	0	1	0	1	1	0	0	0	1	0	0	1	1	0	1	1	0	0	1	0	0	1	0	0	0	0	0	0	1	1	1	0	0	1	0	0	1
48	MFII	0	1	1	0	0	1	0	0	0	0	0	0	0	0	1	1	0	0	0	0	0	0	1	1	0	1	0	0	0	0	0	0	1	0	0	0	0	1	0	1	1	0	0	1	1	0	0	1
48	MFII	0	1	1	0	0	1	0	0	0	0	0	0	0	0	1	1	0	0	0	0	0	0	1	1	0	1	0	0	0	0	0	0	1	0	0	0	0	1	0	1	1	0	0	1	1	0	0	1
102	MFII	0	1	1	0	0	1	1	0	1	0	1	0	1	0	1	1	0	0	0	1	0	0	1	1	0	1	1	0	0	1	0	1	1	0	0	1	0	1	0	1	1	1	0	0	1	0	0	1
102	MFII	0	1	1	0	0	1	1	0	1	0	1	0	1	0	1	1	0	0	0	1	0	0	1	1	0	1	1	0	0	1	0	1	1	0	0	1	0	1	0	1	1	1	0	0	1	0	0	1
103	MFII	0	1	1	0	0	1	1	0	0	0	0	0	1	0	1	1	0	0	0	1	0	0	1	1	0	1	1	0	0	0	0	0	1	0	0	1	0	0	0	0	0	1	0	0	1	0	0	1
103	MFII	0	1	1	0	0	1	1	0	0	0	0	0	1	0	1	1	0	0	0	1	0	0	1	1	0	1	1	0	0	0	0	0	1	0	0	1	0	0	0	0	0	1	0	0	1	0	0	1
203	MFII	0	1	1	0	0	1	1	0	1	0	0	0	1	0	1	1	0	0	0	1	0	0	1	1	0	1	1	0	0	0	0	0	1	0	0	0	0	0	0	0	0	0	0	0	0	0	0	0
203	MFII	0	1	1	0	0	1	1	0	1	0	0	0	1	0	1	1	0	0	0	1	0	0	1	1	0	1	1	0	0	0	0	0	1	0	0	0	0	0	0	0	0	0	0	0	0	0	0	0
204	MFII	0	1	1	0	0	1	1	0	1	0	0	0	1	1	1	1	0	0	0	1	0	0	1	1	0	1	1	0	0	1	0	1	1	0	0	1	0	0	0	0	0	0	0	0	0	0	0	0
204	MFII	0	1	1	0	0	1	1	0	1	0	0	0	1	1	1	1	0	0	0	1	0	0	1	1	0	1	1	0	0	1	0	1	1	0	0	1	0	0	0	0	0	0	0	0	0	0	0	0
205	MFII	0	1	1	0	0	1	1	0	1	0	1	0	1	1	1	1	0	0	0	1	0	0	1	1	0	1	1	0	0	0	0	0	1	0	0	1	0	0	0	0	0	0	0	0	0	0	0	0
205	MFII	0	1	1	0	0	1	1	0	1	0	1	0	1	1	1	1	0	0	0	1	0	0	1	1	0	1	1	0	0	0	0	0	1	0	0	1	0	0	0	0	0	0	0	0	0	0	0	0
206	MFII	0	1	1	0	0	1	1	0	1	0	1	0	1	0	1	1	0	0	0	1	0	0	1	1	0	1	1	0	0	0	0	0	1	0	0	1	0	0	0	0	0	0	0	0	0	0	0	0
206	MFII	0	1	1	0	0	1	1	0	1	0	1	0	1	0	1	1	0	0	0	1	0	0	1	1	0	1	1	0	0	0	0	0	1	0	0	1	0	0	0	0	0	0	0	0	0	0	0	0
339	MFII	0	1	1	0	1	1	1	0	1	0	0	0	1	0	1	1	0	1	0	1	0	1	1	1	0	1	1	0	0	1	0	0	1	0	0	0	0	1	0	1	1	1	0	0	1	0	0	1
339	MFII	0	1	1	0	1	1	1	0	1	0	0	0	1	0	1	1	0	1	0	1	0	1	1	1	0	1	1	0	0	1	0	0	1	0	0	0	0	1	0	1	1	1	0	0	1	0	0	1
340	MFII	0	1	1	0	1	1	1	0	1	0	0	0	1	1	1	1	0	1	0	1	0	0	1	1	0	1	1	0	1	1	0	0	1	0	0	0	0	1	0	1	1	1	0	0	1	0	0	1
340	MFII	0	1	1	0	1	1	1	0	1	0	0	0	1	1	1	1	0	1	0	1	0	0	1	1	0	1	1	0	1	1	0	0	1	0	0	0	0	1	0	1	1	1	0	0	1	0	0	1
354	MFII	0	1	1	0	0	1	1	0	1	0	0	0	1	1	1	1	0	0	0	0	0	0	1	1	0	1	1	0	0	0	0	0	1	0	0	1	0	1	0	1	1	1	0	0	1	1	0	1
354	MFII	0	1	1	0	0	1	1	0	1	0	0	0	1	1	1	1	0	0	0	0	0	0	1	1	0	1	1	0	0	0	0	0	1	0	0	1	0	1	0	1	1	1	0	0	1	1	0	1
355	MFII	0	1	1	0	0	1	1	0	1	0	0	0	1	0	1	1	0	1	0	1	0	0	1	1	0	1	1	0	0	1	0	0	1	0	0	1	0	1	0	1	1	1	0	0	1	0	0	1
355	MFII	0	1	1	0	0	1	1	0	1	0	0	0	1	0	1	1	0	1	0	1	0	0	1	1	0	1	1	0	0	1	0	0	1	0	0	1	0	1	0	1	1	1	0	0	1	0	0	1
369	MFII	0	1	1	0	0	1	1	0	0	0	0	0	0	1	1	1	0	0	0	0	0	0	1	1	0	1	1	0	0	1	0	1	1	0	0	0	0	1	0	1	1	1	0	0	1	0	0	1
369	MFII	0	1	1	0	0	1	1	0	0	0	0	0	0	1	1	1	0	0	0	0	0	0	1	1	0	1	1	0	0	1	0	1	1	0	0	0	0	1	0	1	1	1	0	0	1	0	0	1
370	MFII	0	1	1	0	0	1	1	0	0	0	0	0	1	0	1	1	0	0	0	0	0	0	1	1	0	1	1	0	0	1	0	1	1	0	0	0	0	1	0	1	0	1	1	0	1	0	0	1
370	MFII	0	1	1	0	0	1	1	0	0	0	0	0	1	0	1	1	0	0	0	0	0	0	1	1	0	1	1	0	0	1	0	1	1	0	0	0	0	1	0	1	0	1	1	0	1	0	0	1
383	MFII	0	1	1	0	0	1	1	0	0	0	0	0	1	0	1	1	0	0	0	0	0	0	1	1	0	1	1	0	0	1	0	0	1	0	0	0	0	1	0	1	1	0	0	0	1	0	0	1
383	MFII	0	1	1	0	0	1	1	0	0	0	0	0	1	0	1	1	0	0	0	0	0	0	1	1	0	1	1	0	0	1	0	0	1	0	0	0	0	1	0	1	1	0	0	0	1	0	0	1
384	MFII	0	1	1	0	0	1	1	0	0	0	0	0	1	0	1	1	0	0	0	0	0	0	1	1	0	1	1	0	0	1	0	0	1	0	0	0	0	0	0	1	1	0	0	0	1	0	0	1
384	MFII	0	1	1	0	0	1	1	0	0	0	0	0	1	0	1	1	0	0	0	0	0	0	1	1	0	1	1	0	0	1	0	0	1	0	0	0	0	0	0	1	1	0	0	0	1	0	0	1
396	MFII	0	1	1	0	0	1	1	0	1	1	0	0	1	0	1	1	0	0	0	1	0	0	1	1	0	1	1	0	0	0	0	0	1	0	0	1	0	1	0	1	1	1	0	0	1	0	0	1
396	MFII	0	1	1	0	0	1	1	0	1	1	0	0	1	0	1	1	0	0	0	1	0	0	1	1	0	1	1	0	0	0	0	0	1	0	0	1	0	1	0	1	1	1	0	0	1	0	0	1
397	MFII	0	1	1	0	0	1	1	0	1	0	0	0	1	0	1	1	0	1	0	1	0	1	1	1	0	1	1	0	0	1	0	1	1	0	0	1	0	1	0	1	1	1	0	0	1	0	0	1
397	MFII	0	1	1	0	0	1	1	0	1	0	0	0	1	0	1	1	0	1	0	1	0	1	1	1	0	1	1	0	0	1	0	1	1	0	0	1	0	1	0	1	1	1	0	0	1	0	0	1
398	MFII	0	1	1	0	0	1	1	0	1	0	0	0	1	0	1	1	0	0	0	1	0	0	1	1	0	1	1	0	0	0	0	1	1	0	0	1	0	1	0	1	1	1	1	0	1	0	0	1
398	MFII	0	1	1	0	0	1	1	0	1	0	0	0	1	0	1	1	0	0	0	1	0	0	1	1	0	1	1	0	0	0	0	1	1	0	0	1	0	1	0	1	1	1	1	0	1	0	0	1
156	MFIII	0	1	1	0	0	1	1	0	1	0	0	0	0	0	0	1	0	0	0	0	0	0	0	0	0	0	0	0	0	0	0	0	0	0	0	0	0	0	0	0	0	0	0	0	0	0	0	0
156	MFIII	0	1	1	0	0	1	1	0	1	0	0	0	0	0	0	1	0	0	0	0	0	0	0	0	0	0	0	0	0	0	0	0	0	0	0	0	0	0	0	0	0	0	0	0	0	0	0	0
157	MFIII	0	1	1	0	0	1	1	0	1	0	0	0	0	0	1	1	0	0	0	0	0	0	1	1	0	0	0	0	0	0	0	0	0	0	0	0	0	0	0	0	0	0	0	0	0	0	0	0
157	MFIII	0	1	1	0	0	1	1	0	1	0	0	0	0	0	1	1	0	0	0	0	0	0	1	1	0	0	0	0	0	0	0	0	0	0	0	0	0	0	0	0	0	0	0	0	0	0	0	0
158	MFIII	0	1	1	0	0	1	1	0	1	0	0	0	0	0	1	1	0	0	0	0	0	0	0	1	0	0	0	0	0	0	0	0	0	0	0	0	0	0	0	0	0	0	0	0	0	0	0	0
158	MFIII	0	1	1	0	0	1	1	0	1	0	0	0	0	0	1	1	0	0	0	0	0	0	0	1	0	0	0	0	0	0	0	0	0	0	0	0	0	0	0	0	0	0	0	0	0	0	0	0
159	MFIII	0	1	1	0	0	1	1	0	1	0	0	0	0	0	0	1	0	0	0	0	0	0	0	1	0	0	0	0	0	0	0	0	0	0	0	0	0	0	0	0	0	0	0	0	0	0	0	0
159	MFIII	0	1	1	0	0	1	1	0	1	0	0	0	0	0	0	1	0	0	0	0	0	0	0	1	0	0	0	0	0	0	0	0	0	0	0	0	0	0	0	0	0	0	0	0	0	0	0	0
190	MFIII	1	1	1	0	0	1	1	0	1	0	0	0	0	0	0	1	0	0	0	0	0	0	1	0	0	1	0	0	0	0	0	0	0	0	0	0	0	0	0	0	0	0	0	0	0	0	0	0
190	MFIII	1	1	1	0	0	1	1	0	1	0	0	0	0	0	0	1	0	0	0	0	0	0	1	0	0	1	0	0	0	0	0	0	0	0	0	0	0	0	0	0	0	0	0	0	0	0	0	0
191	MFIII	0	1	1	0	0	1	1	0	1	0	0	0	0	0	1	1	0	0	0	0	0	0	1	1	0	1	0	0	0	0	0	0	0	0	0	0	0	0	0	0	0	0	0	0	0	0	0	0
191	MFIII	0	1	1	0	0	1	1	0	1	0	0	0	0	0	1	1	0	0	0	0	0	0	1	1	0	1	0	0	0	0	0	0	0	0	0	0	0	0	0	0	0	0	0	0	0	0	0	0
224	MFIII	0	1	1	0	0	1	1	0	1	0	0	0	1	0	1	1	0	0	0	1	0	0	1	1	0	1	1	0	0	1	0	1	1	0	0	0	0	1	0	0	1	1	0	0	1	0	0	0
224	MFIII	0	1	1	0	0	1	1	0	1	0	0	0	1	0	1	1	0	0	0	1	0	0	1	1	0	1	1	0	0	1	0	1	1	0	0	0	0	1	0	0	1	1	0	0	1	0	0	0
225	MFIII	0	1	1	0	0	1	1	0	1	0	0	0	1	0	1	1	0	0	0	1	0	0	1	1	0	1	1	0	0	1	0	1	1	0	0	1	0	1	0	1	0	1	0	0	1	0	0	1
225	MFIII	0	1	1	0	0	1	1	0	1	0	0	0	1	0	1	1	0	0	0	1	0	0	1	1	0	1	1	0	0	1	0	1	1	0	0	1	0	1	0	1	0	1	0	0	1	0	0	1
226	MFIII	0	1	1	0	1	1	1	0	1	0	0	0	1	0	1	1	0	0	0	1	0	0	1	1	0	1	1	0	0	1	0	1	1	0	0	0	0	1	0	0	1	1	0	0	1	0	0	0
226	MFIII	0	1	1	0	1	1	1	0	1	0	0	0	1	0	1	1	0	0	0	1	0	0	1	1	0	1	1	0	0	1	0	1	1	0	0	0	0	1	0	0	1	1	0	0	1	0	0	0
245	MFIII	0	1	1	0	0	1	1	0	1	0	0	0	1	0	1	1	0	1	0	1	0	0	1	1	0	1	1	0	0	1	0	1	1	0	0	0	0	1	0	1	0	1	0	0	1	0	0	1
245	MFIII	0	1	1	0	0	1	1	0	1	0	0	0	1	0	1	1	0	1	0	1	0	0	1	1	0	1	1	0	0	1	0	1	1	0	0	0	0	1	0	1	0	1	0	0	1	0	0	1
246	MFIII	0	1	1	0	1	1	1	0	1	0	0	0	1	0	1	1	0	1	0	1	0	0	1	1	0	1	1	0	1	1	0	1	1	0	0	0	0	1	0	1	0	1	0	0	1	0	0	1
246	MFIII	0	1	1	0	1	1	1	0	1	0	0	0	1	0	1	1	0	1	0	1	0	0	1	1	0	1	1	0	1	1	0	1	1	0	0	0	0	1	0	1	0	1	0	0	1	0	0	1
356	MFIII	0	1	1	0	0	1	0	0	1	0	0	0	1	0	1	1	0	1	0	1	0	0	1	1	0	1	1	0	0	0	0	0	1	0	0	1	0	1	0	1	1	1	0	0	1	0	0	1
356	MFIII	0	1	1	0	0	1	0	0	1	0	0	0	1	0	1	1	0	1	0	1	0	0	1	1	0	1	1	0	0	0	0	0	1	0	0	1	0	1	0	1	1	1	0	0	1	0	0	1
357	MFIII	0	1	1	0	0	1	1	0	1	0	0	0	1	1	1	1	0	1	0	1	0	0	1	1	0	1	1	0	0	1	0	0	1	0	0	1	0	1	0	1	0	1	0	0	1	0	0	1
357	MFIII	0	1	1	0	0	1	1	0	1	0	0	0	1	1	1	1	0	1	0	1	0	0	1	1	0	1	1	0	0	1	0	0	1	0	0	1	0	1	0	1	0	1	0	0	1	0	0	1
371	MFIII	0	1	1	0	0	1	1	0	0	0	0	0	0	1	1	1	0	0	0	0	0	0	1	1	0	1	1	0	0	1	0	1	1	0	0	0	0	1	0	1	1	1	1	0	1	0	0	1
371	MFIII	0	1	1	0	0	1	1	0	0	0	0	0	0	1	1	1	0	0	0	0	0	0	1	1	0	1	1	0	0	1	0	1	1	0	0	0	0	1	0	1	1	1	1	0	1	0	0	1
372	MFIII	0	1	1	0	0	1	1	0	1	0	0	0	1	0	1	1	0	0	0	0	0	0	1	1	0	1	1	0	0	1	0	1	1	0	0	0	0	1	0	1	0	1	0	0	1	0	0	1
372	MFIII	0	1	1	0	0	1	1	0	1	0	0	0	1	0	1	1	0	0	0	0	0	0	1	1	0	1	1	0	0	1	0	1	1	0	0	0	0	1	0	1	0	1	0	0	1	0	0	1
385	MFIII	0	1	1	0	0	1	1	0	0	0	0	0	1	0	1	1	0	0	0	0	0	0	1	1	0	1	1	0	0	1	0	0	1	0	0	0	0	1	0	1	0	0	0	0	1	0	0	1
385	MFIII	0	1	1	0	0	1	1	0	0	0	0	0	1	0	1	1	0	0	0	0	0	0	1	1	0	1	1	0	0	1	0	0	1	0	0	0	0	1	0	1	0	0	0	0	1	0	0	1
386	MFIII	0	1	1	0	0	1	1	0	0	0	0	0	1	0	1	1	0	0	0	0	0	0	1	1	0	1	1	0	0	1	0	0	1	0	0	0	0	1	0	1	1	0	0	0	1	0	0	1
386	MFIII	0	1	1	0	0	1	1	0	0	0	0	0	1	0	1	1	0	0	0	0	0	0	1	1	0	1	1	0	0	1	0	0	1	0	0	0	0	1	0	1	1	0	0	0	1	0	0	1
399	MFIII	0	1	1	0	0	1	1	0	1	1	1	0	1	1	1	1	1	0	0	1	1	0	1	1	1	1	1	0	0	0	0	0	1	0	0	1	0	1	0	1	1	1	0	0	1	1	0	1
399	MFIII	0	1	1	0	0	1	1	0	1	1	1	0	1	1	1	1	1	0	0	1	1	0	1	1	1	1	1	0	0	0	0	0	1	0	0	1	0	1	0	1	1	1	0	0	1	1	0	1
400	MFIII	0	1	1	0	0	1	1	0	1	1	1	0	1	1	1	1	0	0	0	1	0	0	1	1	0	1	1	0	0	0	0	0	1	0	0	1	0	1	0	1	1	1	0	0	1	1	0	1
400	MFIII	0	1	1	0	0	1	1	0	1	1	1	0	1	1	1	1	0	0	0	1	0	0	1	1	0	1	1	0	0	0	0	0	1	0	0	1	0	1	0	1	1	1	0	0	1	1	0	1
51	MFIV	0	1	0	0	0	1	1	0	1	0	0	0	0	0	0	1	0	0	0	0	0	0	1	0	0	0	0	0	0	0	0	0	0	0	0	0	0	0	0	0	0	0	0	0	0	0	0	0
51	MFIV	0	1	0	0	0	1	1	0	1	0	0	0	0	0	0	1	0	0	0	0	0	0	1	0	0	0	0	0	0	0	0	0	0	0	0	0	0	0	0	0	0	0	0	0	0	0	0	0
52	MFIV	0	1	1	0	0	1	1	0	1	0	0	0	0	0	1	1	0	0	0	0	0	0	1	1	0	1	0	0	0	0	0	0	0	0	0	0	0	0	0	0	0	0	0	0	0	0	0	0
52	MFIV	0	1	1	0	0	1	1	0	1	0	0	0	0	0	1	1	0	0	0	0	0	0	1	1	0	1	0	0	0	0	0	0	0	0	0	0	0	0	0	0	0	0	0	0	0	0	0	0
53	MFIV	0	1	0	0	0	1	1	0	1	0	0	0	0	0	1	1	0	0	0	0	0	0	1	1	0	1	0	0	0	1	0	0	0	0	0	0	0	0	0	0	0	0	0	0	0	0	0	0
53	MFIV	0	1	0	0	0	1	1	0	1	0	0	0	0	0	1	1	0	0	0	0	0	0	1	1	0	1	0	0	0	1	0	0	0	0	0	0	0	0	0	0	0	0	0	0	0	0	0	0
54	MFIV	0	1	1	0	0	1	1	0	1	0	0	0	0	0	1	1	0	0	0	0	0	0	1	1	0	1	0	0	0	1	0	0	1	0	0	0	0	0	0	0	0	0	0	0	0	0	0	0
54	MFIV	0	1	1	0	0	1	1	0	1	0	0	0	0	0	1	1	0	0	0	0	0	0	1	1	0	1	0	0	0	1	0	0	1	0	0	0	0	0	0	0	0	0	0	0	0	0	0	0
277	MFIV	0	1	1	0	0	1	1	0	1	0	0	0	0	0	1	1	0	0	0	0	0	0	1	1	0	1	0	0	0	0	0	0	0	0	0	0	0	0	0	0	0	0	0	0	0	0	0	0
277	MFIV	0	1	1	0	0	1	1	0	1	0	0	0	0	0	1	1	0	0	0	0	0	0	1	1	0	1	0	0	0	0	0	0	0	0	0	0	0	0	0	0	0	0	0	0	0	0	0	0
278	MFIV	0	1	1	0	0	1	1	0	1	0	0	0	1	1	1	1	0	0	0	1	0	0	1	1	0	1	1	0	0	1	0	1	1	0	0	1	0	1	0	1	1	1	1	0	1	0	0	1
278	MFIV	0	1	1	0	0	1	1	0	1	0	0	0	1	1	1	1	0	0	0	1	0	0	1	1	0	1	1	0	0	1	0	1	1	0	0	1	0	1	0	1	1	1	1	0	1	0	0	1
294	MFIV	0	1	1	0	0	1	1	0	0	0	0	0	1	0	1	1	0	0	0	0	0	0	1	1	0	1	1	0	0	1	0	0	1	0	0	0	0	0	0	0	0	0	0	0	1	0	0	0
294	MFIV	0	1	1	0	0	1	1	0	0	0	0	0	1	0	1	1	0	0	0	0	0	0	1	1	0	1	1	0	0	1	0	0	1	0	0	0	0	0	0	0	0	0	0	0	1	0	0	0
295	MFIV	0	1	1	0	0	1	1	0	0	0	0	0	1	0	1	1	0	0	0	0	0	0	1	1	0	1	1	0	0	1	0	0	1	0	0	0	0	0	0	0	0	0	0	0	1	0	0	0
295	MFIV	0	1	1	0	0	1	1	0	0	0	0	0	1	0	1	1	0	0	0	0	0	0	1	1	0	1	1	0	0	1	0	0	1	0	0	0	0	0	0	0	0	0	0	0	1	0	0	0
358	MFIV	0	1	1	0	0	1	1	0	0	0	0	0	1	0	1	1	0	1	0	1	0	0	1	1	0	1	1	0	0	1	0	0	1	0	0	1	0	1	0	1	0	1	0	0	1	0	0	1
358	MFIV	0	1	1	0	0	1	1	0	0	0	0	0	1	0	1	1	0	1	0	1	0	0	1	1	0	1	1	0	0	1	0	0	1	0	0	1	0	1	0	1	0	1	0	0	1	0	0	1
359	MFIV	0	1	1	0	0	1	0	0	1	0	0	0	1	0	1	1	0	1	0	1	0	0	1	1	0	1	1	0	0	0	0	0	1	0	0	1	0	1	0	1	1	1	0	0	1	0	0	1
359	MFIV	0	1	1	0	0	1	0	0	1	0	0	0	1	0	1	1	0	1	0	1	0	0	1	1	0	1	1	0	0	0	0	0	1	0	0	1	0	1	0	1	1	1	0	0	1	0	0	1
360	MFIV	0	1	1	0	0	1	1	0	1	0	0	0	1	0	1	1	0	1	0	1	0	0	1	1	0	1	1	0	0	1	0	0	1	0	0	1	0	1	0	1	0	1	0	0	1	0	0	1
360	MFIV	0	1	1	0	0	1	1	0	1	0	0	0	1	0	1	1	0	1	0	1	0	0	1	1	0	1	1	0	0	1	0	0	1	0	0	1	0	1	0	1	0	1	0	0	1	0	0	1
373	MFIV	0	1	1	0	0	1	1	0	1	0	0	0	1	0	1	1	0	0	0	0	0	0	1	1	0	1	1	0	0	1	0	1	1	0	0	1	0	1	0	1	1	1	1	0	1	0	0	1
373	MFIV	0	1	1	0	0	1	1	0	1	0	0	0	1	0	1	1	0	0	0	0	0	0	1	1	0	1	1	0	0	1	0	1	1	0	0	1	0	1	0	1	1	1	1	0	1	0	0	1
374	MFIV	0	1	1	0	0	1	1	0	1	0	0	0	1	0	1	1	0	0	0	0	0	0	1	1	0	1	1	0	0	1	0	1	1	0	0	0	0	1	0	1	1	1	0	0	1	0	0	1
374	MFIV	0	1	1	0	0	1	1	0	1	0	0	0	1	0	1	1	0	0	0	0	0	0	1	1	0	1	1	0	0	1	0	1	1	0	0	0	0	1	0	1	1	1	0	0	1	0	0	1
375	MFIV	0	1	1	0	0	1	1	0	1	0	0	0	1	0	1	1	0	0	0	0	0	0	1	1	0	1	1	0	0	1	0	1	1	0	0	0	0	0	0	1	1	1	1	0	1	0	0	1
375	MFIV	0	1	1	0	0	1	1	0	1	0	0	0	1	0	1	1	0	0	0	0	0	0	1	1	0	1	1	0	0	1	0	1	1	0	0	0	0	0	0	1	1	1	1	0	1	0	0	1
387	MFIV	0	1	1	0	0	1	1	0	0	0	0	0	1	0	1	1	0	0	0	0	0	0	1	1	0	1	1	0	0	1	0	0	1	0	0	0	0	1	0	1	1	0	0	0	1	0	0	1
387	MFIV	0	1	1	0	0	1	1	0	0	0	0	0	1	0	1	1	0	0	0	0	0	0	1	1	0	1	1	0	0	1	0	0	1	0	0	0	0	1	0	1	1	0	0	0	1	0	0	1
388	MFIV	0	1	1	0	0	1	1	0	0	0	0	0	1	0	1	1	0	0	0	0	0	0	1	1	0	1	1	0	0	1	0	0	0	0	0	0	0	0	0	1	1	0	0	0	1	0	0	1
388	MFIV	0	1	1	0	0	1	1	0	0	0	0	0	1	0	1	1	0	0	0	0	0	0	1	1	0	1	1	0	0	1	0	0	0	0	0	0	0	0	0	1	1	0	0	0	1	0	0	1
401	MFIV	0	1	1	0	0	1	1	0	1	0	0	1	1	0	1	1	0	0	0	1	0	0	1	1	0	1	1	0	0	1	0	1	1	0	0	1	0	1	0	1	1	1	0	0	1	0	0	1
401	MFIV	0	1	1	0	0	1	1	0	1	0	0	1	1	0	1	1	0	0	0	1	0	0	1	1	0	1	1	0	0	1	0	1	1	0	0	1	0	1	0	1	1	1	0	0	1	0	0	1
402	MFIV	0	1	1	0	0	1	1	0	1	0	1	0	1	0	1	1	0	0	0	1	1	0	1	1	0	1	1	0	0	0	0	0	1	0	0	1	0	1	0	1	1	1	0	0	1	0	0	1
402	MFIV	0	1	1	0	0	1	1	0	1	0	1	0	1	0	1	1	0	0	0	1	1	0	1	1	0	1	1	0	0	0	0	0	1	0	0	1	0	1	0	1	1	1	0	0	1	0	0	1
403	MFIV	0	1	1	0	0	1	1	0	1	0	0	0	1	0	1	1	0	0	0	1	0	0	1	1	0	1	1	0	0	1	0	1	1	0	0	1	0	1	0	1	0	1	0	0	1	0	0	0
403	MFIV	0	1	1	0	0	1	1	0	1	0	0	0	1	0	1	1	0	0	0	1	0	0	1	1	0	1	1	0	0	1	0	1	1	0	0	1	0	1	0	1	0	1	0	0	1	0	0	0
423	MFIV	0	1	1	0	0	1	1	0	1	0	0	0	1	0	1	1	0	0	0	1	0	0	1	1	0	1	1	0	0	1	0	1	1	0	1	1	0	0	0	1	0	1	0	0	1	0	0	1
423	MFIV	0	1	1	0	0	1	1	0	1	0	0	0	1	0	1	1	0	0	0	1	0	0	1	1	0	1	1	0	0	1	0	1	1	0	1	1	0	0	0	1	0	1	0	0	1	0	0	1
424	MFIV	0	1	1	0	0	1	1	0	1	0	1	0	1	0	1	1	0	0	0	1	0	0	1	1	0	1	1	0	0	1	0	1	1	0	1	1	0	1	0	1	1	1	0	0	1	0	0	1
424	MFIV	0	1	1	0	0	1	1	0	1	0	1	0	1	0	1	1	0	0	0	1	0	0	1	1	0	1	1	0	0	1	0	1	1	0	1	1	0	1	0	1	1	1	0	0	1	0	0	1
425	MFIV	0	1	1	0	0	1	1	0	1	0	0	0	1	0	1	1	0	0	0	1	0	0	1	1	0	1	1	0	0	1	0	1	1	0	1	1	1	1	0	1	1	1	0	0	1	0	0	1
425	MFIV	0	1	1	0	0	1	1	0	1	0	0	0	1	0	1	1	0	0	0	1	0	0	1	1	0	1	1	0	0	1	0	1	1	0	1	1	1	1	0	1	1	1	0	0	1	0	0	1
426	MFIV	0	1	1	0	0	1	1	0	1	0	0	0	1	1	1	1	0	0	0	1	0	0	1	1	0	1	1	0	0	1	0	1	1	0	1	1	0	1	0	1	0	1	0	0	1	0	0	1
426	MFIV	0	1	1	0	0	1	1	0	1	0	0	0	1	1	1	1	0	0	0	1	0	0	1	1	0	1	1	0	0	1	0	1	1	0	1	1	0	1	0	1	0	1	0	0	1	0	0	1
427	MFIV	0	1	1	0	0	1	1	0	1	0	1	0	1	0	1	1	0	0	0	1	0	0	1	1	0	1	1	0	0	0	0	0	1	0	1	1	0	1	0	1	1	1	0	0	1	0	0	1
427	MFIV	0	1	1	0	0	1	1	0	1	0	1	0	1	0	1	1	0	0	0	1	0	0	1	1	0	1	1	0	0	0	0	0	1	0	1	1	0	1	0	1	1	1	0	0	1	0	0	1
429	MFIV	0	1	1	0	0	1	1	0	1	0	0	0	1	0	1	1	0	0	0	1	0	0	1	1	0	1	1	0	0	0	0	0	1	0	1	1	0	1	0	1	1	1	0	0	1	0	0	1
429	MFIV	0	1	1	0	0	1	1	0	1	0	0	0	1	0	1	1	0	0	0	1	0	0	1	1	0	1	1	0	0	0	0	0	1	0	1	1	0	1	0	1	1	1	0	0	1	0	0	1
76	F4	0	1	1	1	0	1	0	0	1	0	1	0	1	0	1	1	0	0	1	1	0	0	1	1	0	1	1	0	0	0	0	0	1	1	0	1	0	1	0	0	1	1	0	0	1	0	0	1
76	F4	0	1	1	1	0	1	0	0	1	0	1	0	1	0	1	1	0	0	1	1	0	0	1	1	0	1	1	0	0	0	0	0	1	1	0	1	0	1	0	0	1	1	0	0	1	0	0	1
77	F4	0	1	1	0	0	1	1	0	1	0	0	0	0	0	1	1	0	0	0	1	0	0	1	1	0	1	1	0	0	1	0	0	1	0	0	0	0	0	0	0	0	0	0	0	1	0	0	0
77	F4	0	1	1	0	0	1	1	0	1	0	0	0	0	0	1	1	0	0	0	1	0	0	1	1	0	1	1	0	0	1	0	0	1	0	0	0	0	0	0	0	0	0	0	0	1	0	0	0
81	F4	0	1	1	0	0	1	1	0	1	0	0	0	0	0	1	1	0	0	0	0	0	1	1	1	0	1	0	0	0	1	0	0	1	0	0	0	0	0	0	0	0	0	0	0	0	0	0	0
81	F4	0	1	1	0	0	1	1	0	1	0	0	0	0	0	1	1	0	0	0	0	0	1	1	1	0	1	0	0	0	1	0	0	1	0	0	0	0	0	0	0	0	0	0	0	0	0	0	0
82	F4	0	1	1	0	0	1	1	0	1	0	0	0	0	0	1	1	0	0	0	0	0	0	1	1	0	1	0	0	0	1	0	0	1	0	0	0	0	0	0	0	0	0	0	0	0	0	0	0
82	F4	0	1	1	0	0	1	1	0	1	0	0	0	0	0	1	1	0	0	0	0	0	0	1	1	0	1	0	0	0	1	0	0	1	0	0	0	0	0	0	0	0	0	0	0	0	0	0	0
83	F4	0	1	1	0	0	1	1	0	1	0	0	0	0	0	1	1	0	0	0	0	0	0	1	1	0	1	0	0	0	1	0	0	1	0	0	0	0	0	0	0	0	0	0	0	0	0	0	0
83	F4	0	1	1	0	0	1	1	0	1	0	0	0	0	0	1	1	0	0	0	0	0	0	1	1	0	1	0	0	0	1	0	0	1	0	0	0	0	0	0	0	0	0	0	0	0	0	0	0
111	F4	0	1	1	0	1	1	1	0	1	0	0	0	1	0	1	1	0	0	0	1	0	0	1	1	0	1	1	0	0	1	0	0	1	0	0	0	0	1	0	0	0	1	0	0	1	0	0	0
111	F4	0	1	1	0	1	1	1	0	1	0	0	0	1	0	1	1	0	0	0	1	0	0	1	1	0	1	1	0	0	1	0	0	1	0	0	0	0	1	0	0	0	1	0	0	1	0	0	0
112	F4	0	1	1	0	1	1	1	0	1	0	0	0	1	1	1	1	0	0	0	1	0	0	1	1	0	1	1	0	0	1	0	0	1	0	0	0	0	1	0	1	0	1	0	0	1	0	0	1
112	F4	0	1	1	0	1	1	1	0	1	0	0	0	1	1	1	1	0	0	0	1	0	0	1	1	0	1	1	0	0	1	0	0	1	0	0	0	0	1	0	1	0	1	0	0	1	0	0	1
113	F4	0	1	1	0	1	1	1	0	1	0	0	0	1	0	1	1	0	0	0	1	0	0	1	1	0	1	1	0	0	1	0	0	1	0	0	0	0	1	0	1	0	1	0	0	1	0	0	0
113	F4	0	1	1	0	1	1	1	0	1	0	0	0	1	0	1	1	0	0	0	1	0	0	1	1	0	1	1	0	0	1	0	0	1	0	0	0	0	1	0	1	0	1	0	0	1	0	0	0
192	F4	0	1	1	0	0	1	1	0	1	0	0	0	0	0	1	1	0	0	0	0	0	0	1	1	0	1	0	0	0	0	0	0	0	0	0	0	0	0	0	0	0	0	0	0	0	0	0	0
192	F4	0	1	1	0	0	1	1	0	1	0	0	0	0	0	1	1	0	0	0	0	0	0	1	1	0	1	0	0	0	0	0	0	0	0	0	0	0	0	0	0	0	0	0	0	0	0	0	0
193	F4	0	1	1	0	0	1	1	0	1	0	0	0	0	0	1	1	0	0	0	0	0	0	1	1	0	1	0	0	0	1	0	0	0	0	0	0	0	0	0	0	0	0	0	0	0	0	0	0
193	F4	0	1	1	0	0	1	1	0	1	0	0	0	0	0	1	1	0	0	0	0	0	0	1	1	0	1	0	0	0	1	0	0	0	0	0	0	0	0	0	0	0	0	0	0	0	0	0	0
194	F4	0	1	1	0	0	1	1	0	1	0	0	0	0	0	1	1	0	0	0	0	0	0	1	1	0	1	0	0	0	0	0	0	0	0	0	0	0	0	0	0	0	0	0	0	0	0	0	0
194	F4	0	1	1	0	0	1	1	0	1	0	0	0	0	0	1	1	0	0	0	0	0	0	1	1	0	1	0	0	0	0	0	0	0	0	0	0	0	0	0	0	0	0	0	0	0	0	0	0
207	F4	0	1	1	0	0	1	1	0	1	0	0	0	1	1	1	1	0	0	0	1	0	0	1	1	0	1	1	0	0	0	0	0	1	0	0	1	0	0	0	0	0	0	0	0	0	0	0	0
207	F4	0	1	1	0	0	1	1	0	1	0	0	0	1	1	1	1	0	0	0	1	0	0	1	1	0	1	1	0	0	0	0	0	1	0	0	1	0	0	0	0	0	0	0	0	0	0	0	0
208	F4	0	1	1	0	0	1	1	0	1	1	1	0	1	0	1	1	0	0	0	1	0	0	1	1	0	1	1	0	0	0	0	0	1	0	0	1	0	0	0	0	0	0	0	0	0	0	0	0
208	F4	0	1	1	0	0	1	1	0	1	1	1	0	1	0	1	1	0	0	0	1	0	0	1	1	0	1	1	0	0	0	0	0	1	0	0	1	0	0	0	0	0	0	0	0	0	0	0	0
209	F4	0	1	1	0	0	1	1	0	1	0	1	0	1	0	1	1	0	0	0	1	0	0	1	1	1	1	1	0	0	0	0	0	1	0	0	1	0	0	0	0	0	0	0	0	0	0	0	0
209	F4	0	1	1	0	0	1	1	0	1	0	1	0	1	0	1	1	0	0	0	1	0	0	1	1	1	1	1	0	0	0	0	0	1	0	0	1	0	0	0	0	0	0	0	0	0	0	0	0
210	F4	0	0	0	0	0	1	0	0	1	0	0	0	1	0	1	1	0	0	0	0	0	0	1	1	0	1	1	0	0	0	0	0	1	0	0	1	0	0	0	0	0	0	0	0	0	0	0	0
210	F4	0	0	0	0	0	1	0	0	1	0	0	0	1	0	1	1	0	0	0	0	0	0	1	1	0	1	1	0	0	0	0	0	1	0	0	1	0	0	0	0	0	0	0	0	0	0	0	0
389	F4	0	1	1	0	0	1	1	0	0	0	0	0	1	0	1	1	0	0	0	0	0	0	1	1	0	1	1	0	0	1	0	0	1	0	0	0	0	1	0	1	0	0	0	0	1	0	0	1
389	F4	0	1	1	0	0	1	1	0	0	0	0	0	1	0	1	1	0	0	0	0	0	0	1	1	0	1	1	0	0	1	0	0	1	0	0	0	0	1	0	1	0	0	0	0	1	0	0	1
390	F4	0	1	1	0	0	1	1	0	0	0	0	0	0	1	1	1	0	0	0	0	0	0	1	1	0	1	1	0	0	1	0	0	1	0	0	0	0	1	0	1	1	0	0	0	1	0	0	1
390	F4	0	1	1	0	0	1	1	0	0	0	0	0	0	1	1	1	0	0	0	0	0	0	1	1	0	1	1	0	0	1	0	0	1	0	0	0	0	1	0	1	1	0	0	0	1	0	0	1
404	F4	0	1	1	0	0	1	1	0	1	0	1	0	1	1	1	1	0	0	0	1	0	0	1	1	0	1	1	0	0	0	0	1	1	0	0	1	0	0	0	1	0	1	1	0	1	0	0	1
404	F4	0	1	1	0	0	1	1	0	1	0	1	0	1	1	1	1	0	0	0	1	0	0	1	1	0	1	1	0	0	0	0	1	1	0	0	1	0	0	0	1	0	1	1	0	1	0	0	1
405	F4	0	1	1	0	0	1	1	0	1	0	0	0	1	1	1	1	0	1	0	1	0	0	1	1	0	1	1	0	0	1	0	1	1	0	0	1	0	1	0	1	0	1	0	0	1	0	0	1
405	F4	0	1	1	0	0	1	1	0	1	0	0	0	1	1	1	1	0	1	0	1	0	0	1	1	0	1	1	0	0	1	0	1	1	0	0	1	0	1	0	1	0	1	0	0	1	0	0	1
430	F4	0	1	1	0	0	1	1	0	1	0	0	0	1	0	1	1	0	0	0	1	0	1	1	1	0	1	1	0	0	1	0	1	1	0	1	1	1	1	0	1	1	1	0	0	1	0	0	1
430	F4	0	1	1	0	0	1	1	0	1	0	0	0	1	0	1	1	0	0	0	1	0	1	1	1	0	1	1	0	0	1	0	1	1	0	1	1	1	1	0	1	1	1	0	0	1	0	0	1
431	F4	0	1	1	0	0	1	0	0	1	0	1	0	1	0	1	1	0	0	0	1	0	0	1	1	0	1	1	0	0	0	0	1	1	0	1	1	1	1	0	1	1	1	1	0	1	0	0	1
431	F4	0	1	1	0	0	1	0	0	1	0	1	0	1	0	1	1	0	0	0	1	0	0	1	1	0	1	1	0	0	0	0	1	1	0	1	1	1	1	0	1	1	1	1	0	1	0	0	1
432	F4	0	0	0	0	0	0	0	0	1	0	0	0	1	0	1	0	0	0	0	1	0	0	1	1	0	1	1	0	0	0	0	0	1	0	0	1	0	1	0	0	0	1	0	0	1	0	0	1
432	F4	0	0	0	0	0	0	0	0	1	0	0	0	1	0	1	0	0	0	0	1	0	0	1	1	0	1	1	0	0	0	0	0	1	0	0	1	0	1	0	0	0	1	0	0	1	0	0	1
433	F4	0	0	0	0	0	0	0	0	0	0	0	0	0	0	0	0	0	0	0	0	0	0	0	1	0	1	1	0	0	0	0	0	1	0	0	1	0	0	0	0	1	1	0	0	1	0	0	0
433	F4	0	0	0	0	0	0	0	0	0	0	0	0	0	0	0	0	0	0	0	0	0	0	0	1	0	1	1	0	0	0	0	0	1	0	0	1	0	0	0	0	1	1	0	0	1	0	0	0
[truncated: 70 more columns]
